# Supplementary material for: Differing Life-History Strategies of Two Mycoheterotrophic Orchid Species Associated with Leaf Litter- and Wood-Decaying Fungi
Source: MDPI journal article supplement (doi:10.3390/d13040161), 2021-04-08
Supplement: s1 [file s1]

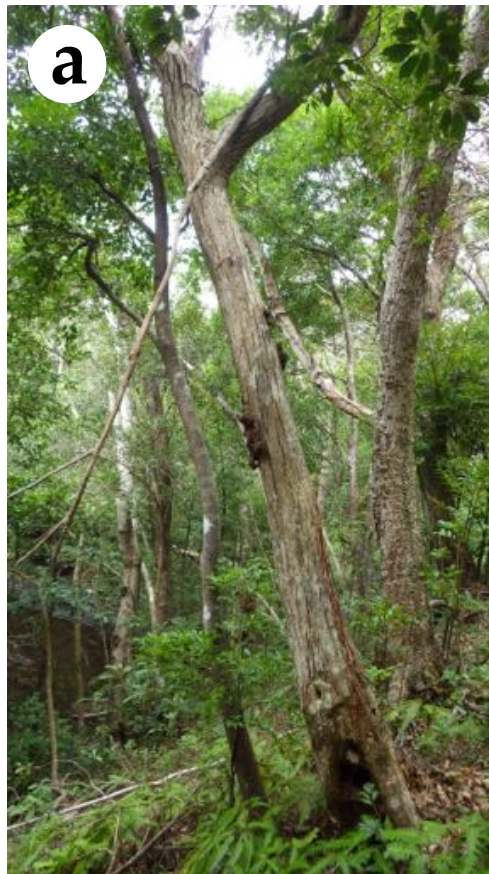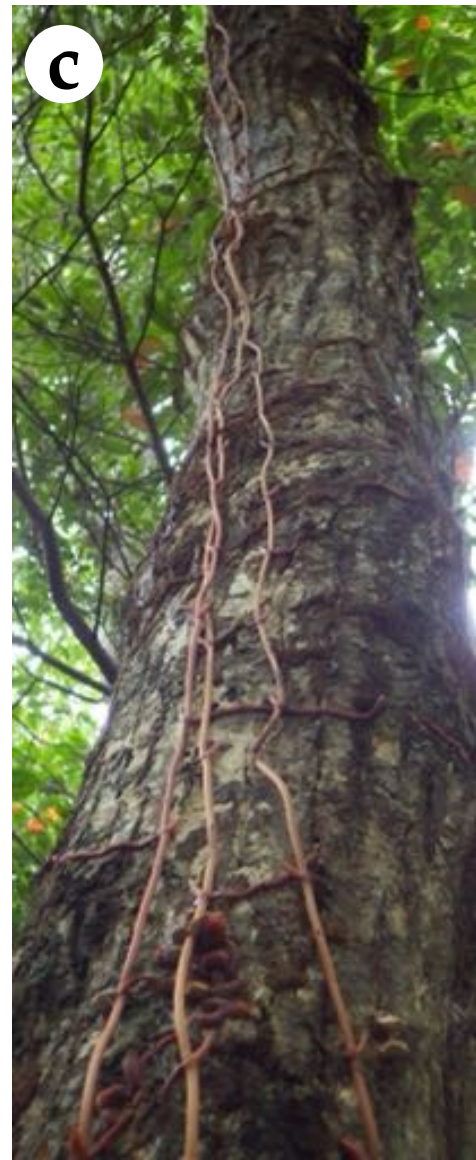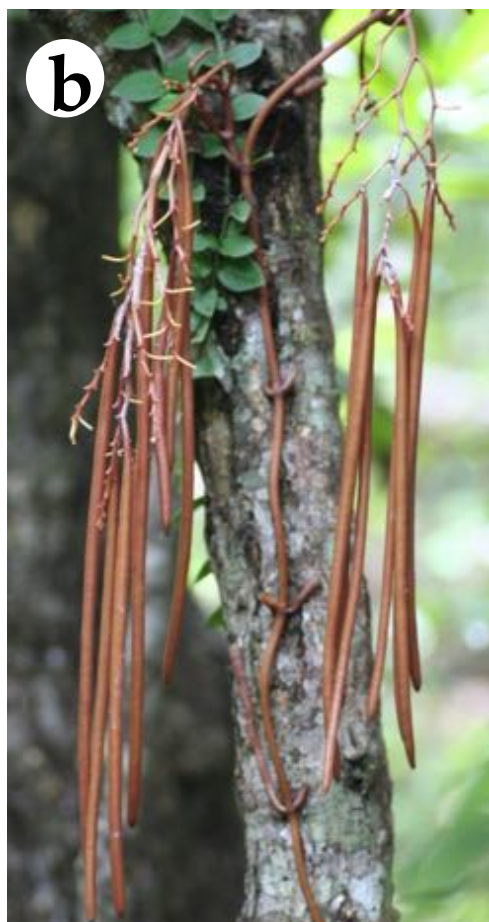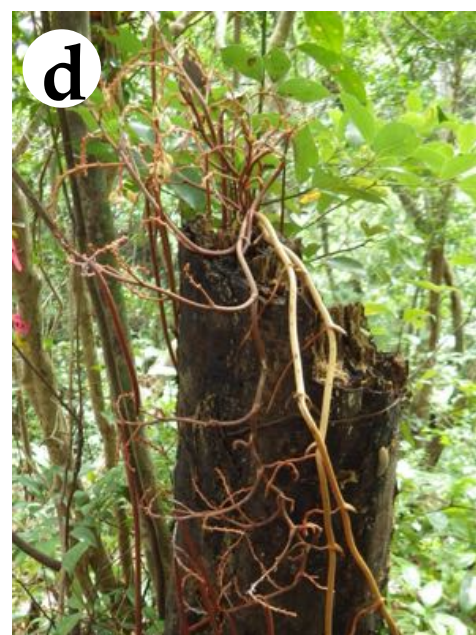

**Figure S1** *Erythrorchis altissima* (a) study site and (b) fruits. (c) Stems climbing on living tree and (d) standing dead wood.

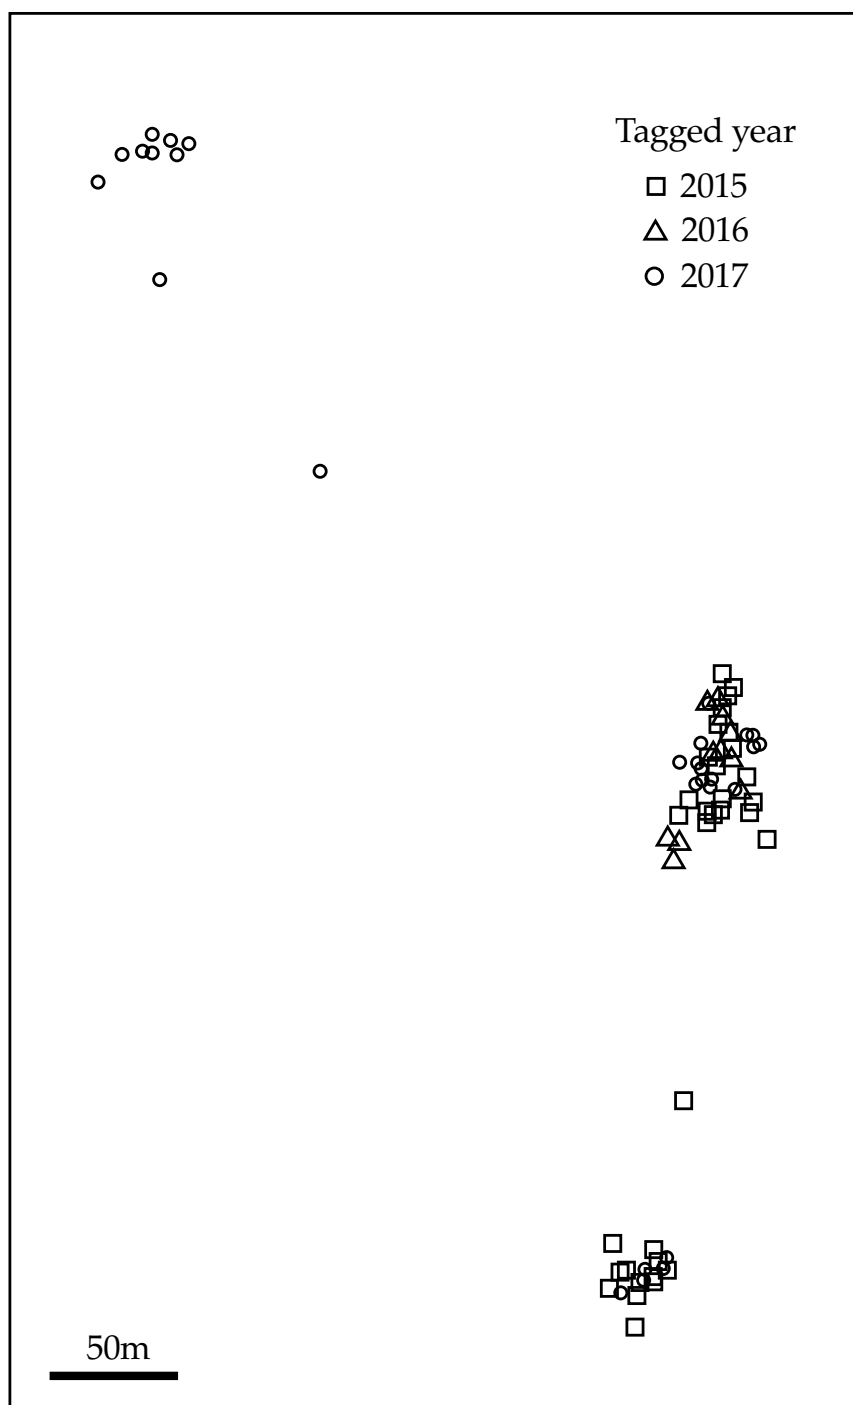

**Figure S2** Map of *Erythrorchis altissima* plants tagged in the study plot (300 × 500 m) in each year between 2015 and 2017.



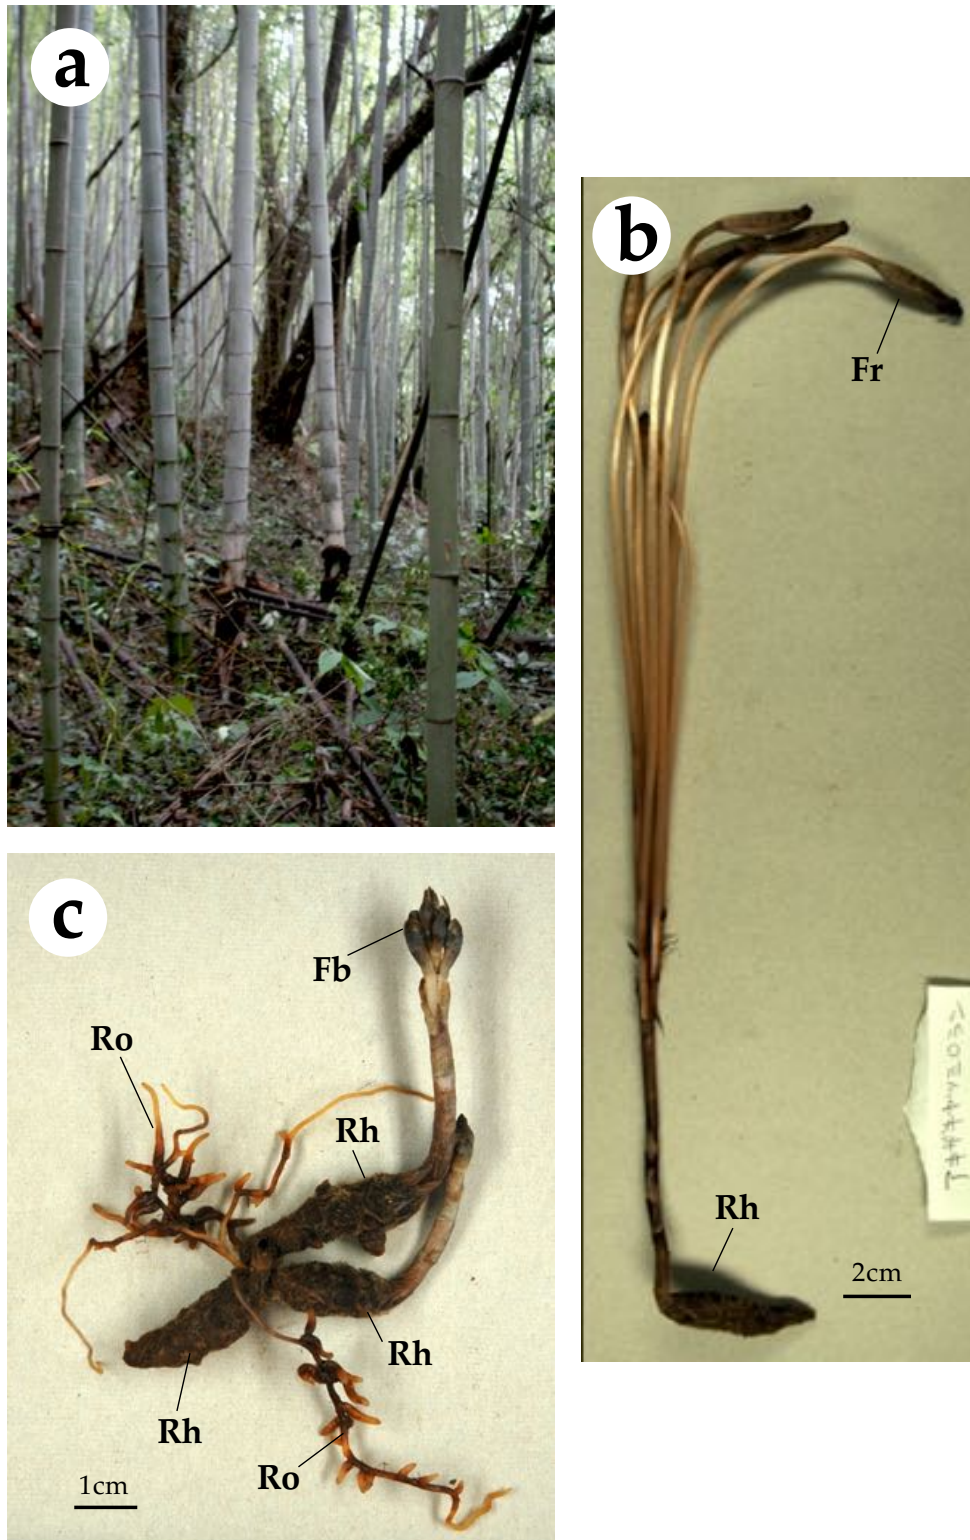

**Figure S3** *Gastrodia confusa* (a) study site and (b) plants with fruits and (c) flower buds. Rh: rhizome, Ro: root, Fb: flower bud, Fr: fruit

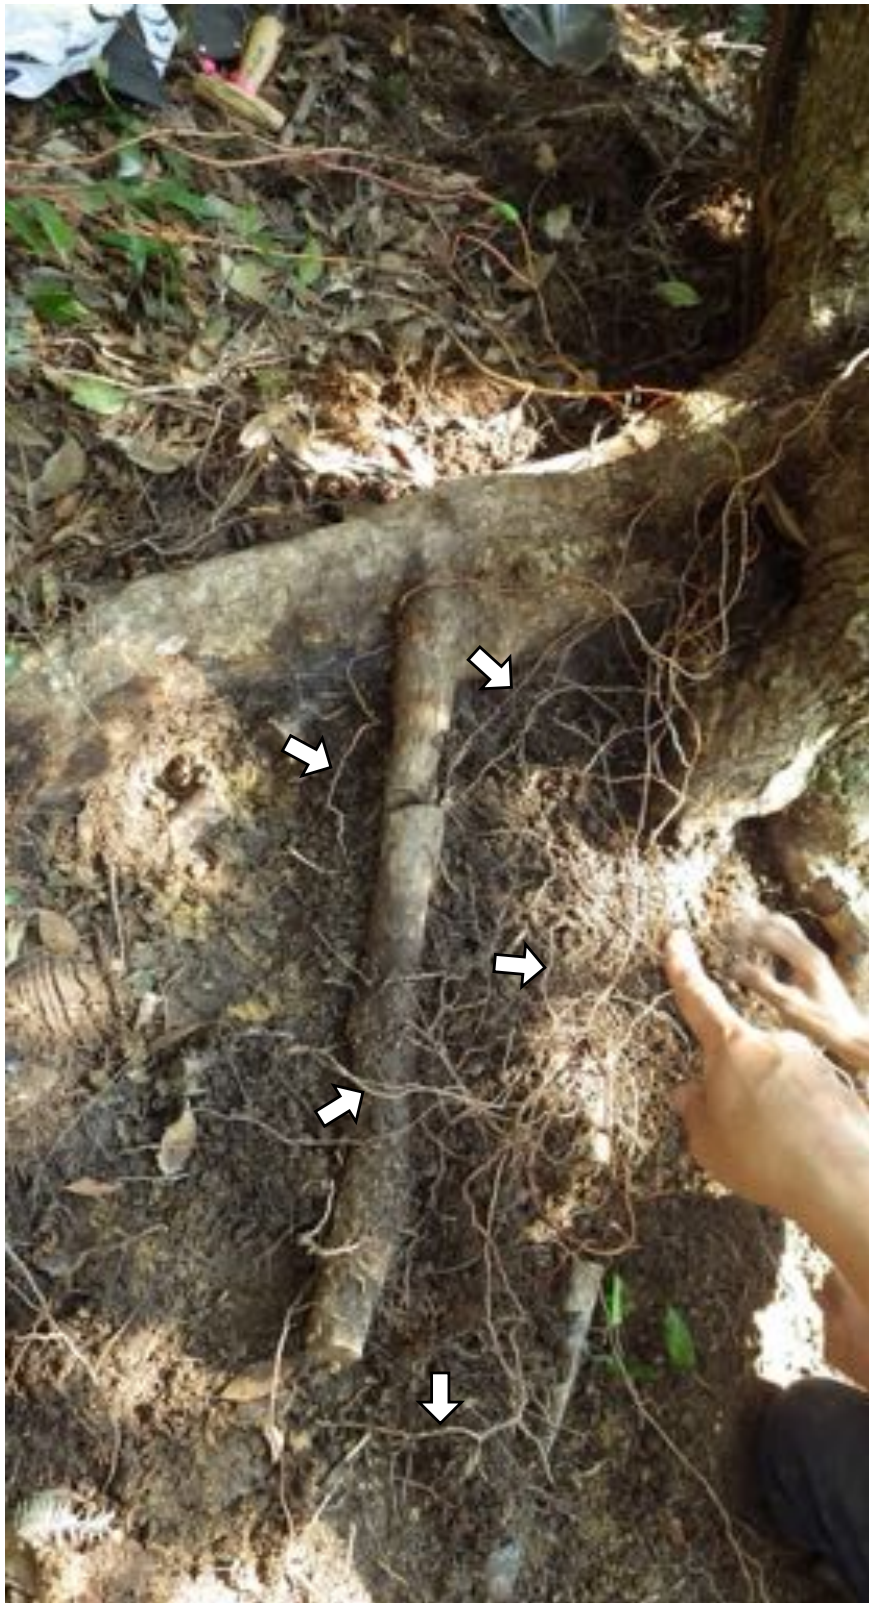

**Figure S4** Underground root system of *Erythrorchis altissima*. White arrows show the roots of *E. altissima*.
